# Supplementary material for: Study of the Ternary Mixture of Methanol/Formamide/Acetonitrile via Solvatochromic Probes
Source: MDPI journal article supplement (doi:10.3390/molecules29010246), 2024-01-02
Supplement: s1 [file s1]

# Supplementary Material

## Study of the Ternary Mixture of Methanol/Formamide/ Acetonitrile via Solvatochromic Probes

Nelson Nunes <sup>1,2,\*</sup>, Ruben Elvas-Leitão <sup>1,2</sup> and Filomena Martins <sup>2,3,\*</sup>

<sup>1</sup> Departamento de Engenharia Química, Instituto Superior de Engenharia de Lisboa, Instituto Politécnico de Lisboa, Rua Conselheiro Emídio Navarro, 1959-007 Lisboa, Portugal; ruben.leitao@isel.pt

<sup>2</sup> Centro de Química Estrutural, Institute of Molecular Sciences, Faculdade de Ciências, Universidade de Lisboa, Ed. C8, Campo Grande, 1749-016 Lisboa, Portugal

<sup>3</sup> Departamento de Química e Bioquímica, Faculdade de Ciências, Universidade de Lisboa, Ed. C8, Campo Grande, 1749-016 Lisboa, Portugal

\* Correspondence: nelson.nunes@isel.pt (N.N.); filomena.martins@ciencias.ulisboa.pt (F.M.)

**Table S1. Wavenumbers for each probe in methanol/formamide at 298.15 K (values in kK, 1 kK = 10<sup>3</sup> cm<sup>-1</sup>).**

| Methanol/Formamide    |               |                |               |                |                                     |
|-----------------------|---------------|----------------|---------------|----------------|-------------------------------------|
| $x_{\text{methanol}}$ | Betaine (30)  | 4-Nitroaniline | 4-Nitrophenol | 4-Nitroanisole | <i>N,N</i> -dimethyl-4-nitroaniline |
| 1.00                  | 19.386 ±0.023 | 27.010 ±0.000  | 32.101 ±0.041 | 32.701 ±0.023  | 25.641 ±0.008                       |
| 0.90                  | 19.543 ±0.009 | 26.842 ±0.014  |               | 32.493 ±0.028  | 25.426 ±0.007                       |
| 0.80                  | 19.631 ±0.000 | 26.692 ±0.023  |               | 32.410 ±0.020  | 25.219 ±0.007                       |
| 0.70                  | 19.674 ±0.012 | 26.483 ±0.000  |               | 32.180 ±0.026  | 25.063 ±0.000                       |
| 0.60                  | 19.706 ±0.009 | 26.455 ±0.000  |               | 32.051 ±0.017  | 25.063 ±0.000                       |
| 0.50                  | 19.701 ±0.006 | 26.256 ±0.008  |               | 31.923 ±0.020  | 24.647 ±0.007                       |
| 0.40                  | 19.716 ±0.000 | 26.224 ±0.008  |               | 31.832 ±0.019  | 24.554 ±0.007                       |
| 0.30                  | 19.695 ±0.004 | 26.114 ±0.008  |               | 31.719 ±0.012  | 24.522 ±0.000                       |
| 0.20                  | 19.698 ±0.004 | 26.082 ±0.011  |               | 31.666 ±0.016  | 24.288 ±0.007                       |
| 0.10                  | 19.645 ±0.011 | 26.006 ±0.015  |               | 31.539 ±0.011  | 24.192 ±0.019                       |
| 0.00                  | 19.614 ±0.007 | 25.950 ±0.013  |               | 31.420 ±0.011  | 24.093 ±0.007                       |

**Table S2. Wavenumbers for each probe in formamide/acetonitrile at 298.15 K (values in kK, 1 kK = 10<sup>3</sup> cm<sup>-1</sup>).**

| Formamide/Acetonitrile    |               |                |               |                |                                     |
|---------------------------|---------------|----------------|---------------|----------------|-------------------------------------|
| $x_{\text{acetonitrile}}$ | Betaine (30)  | 4-Nitroaniline | 4-Nitrophenol | 4-Nitroanisole | <i>N,N</i> -dimethyl-4-nitroaniline |
| 1.00                      | 16.013 ±0.000 | 27.457 ±0.000  | 32.552 ±0.000 | 32.418 ±0.012  | 25.407 ±0.000                       |
| 0.90                      | 18.129 ±0.019 | 27.304 ±0.014  | 31.933 ±0.022 | 32.432 ±0.012  | 25.339 ±0.012                       |
| 0.80                      | 18.472 ±0.014 | 27.037 ±0.008  | 31.762 ±0.026 | 32.244 ±0.012  | 25.142 ±0.007                       |
| 0.70                      | 18.710 ±0.004 | 26.915 ±0.008  | 31.674 ±0.045 | 32.170 ±0.012  | 25.063 ±0.000                       |
| 0.60                      | 18.834 ±0.007 | 26.714 ±0.008  | 31.581 ±0.019 | 32.092 ±0.000  | 25.063 ±0.000                       |
| 0.50                      | 18.981 ±0.008 | 26.539 ±0.014  | 31.577 ±0.032 | 31.928 ±0.000  | 24.712 ±0.007                       |
| 0.40                      | 19.133 ±0.004 | 26.418 ±0.007  | 31.458 ±0.032 | 31.969 ±0.033  | 24.785 ±0.007                       |
| 0.30                      | 19.233 ±0.007 | 26.302 ±0.011  | 31.296 ±0.011 | 31.759 ±0.012  | 24.466 ±0.007                       |
| 0.20                      | 19.390 ±0.004 | 26.183 ±0.008  | 31.111 ±0.057 | 31.686 ±0.000  | 24.331 ±0.000                       |
| 0.10                      | 19.423 ±0.007 | 26.110 ±0.000  | 30.834 ±0.044 | 31.632 ±0.012  | 24.221 ±0.007                       |
| 0.00                      | 19.614 ±0.007 | 25.950 ±0.013  |               | 31.420 ±0.011  | 24.093 ±0.007                       |

**Table S3. Wavenumbers for each probe in methanol/acetonitrile at 298.15 K. Data was taken from our previous work [3,23,24] (values in kK, 1 kK =  $10^3 \text{ cm}^{-1}$ ).**

| Methanol/Acetonitrile |                    |                    |                    |                    |                                     |
|-----------------------|--------------------|--------------------|--------------------|--------------------|-------------------------------------|
| $x_{\text{methanol}}$ | Betaine (30)       | 4-Nitroaniline     | 4-Nitrophenol      | 4-Nitroanisole     | <i>N,N</i> -dimethyl-4-nitroaniline |
| 1.000                 | 19.388 $\pm$ 0.021 | 27.012 $\pm$ 0.000 | 32.101 $\pm$ 0.040 | 32.701 $\pm$ 0.023 | 25.641 $\pm$ 0.008                  |
| 0.955                 | 19.443 $\pm$ 0.022 | 27.056 $\pm$ 0.012 | 32.088 $\pm$ 0.034 | 32.775 $\pm$ 0.071 | 25.632 $\pm$ 0.008                  |
| 0.910                 | 19.417 $\pm$ 0.000 | 27.086 $\pm$ 0.000 | 32.072 $\pm$ 0.000 | 32.683 $\pm$ 0.029 | 25.602 $\pm$ 0.000                  |
| 0.875                 | 19.417 $\pm$ 0.000 | 27.108 $\pm$ 0.062 | 32.092 $\pm$ 0.000 | 32.623 $\pm$ 0.026 | 25.523 $\pm$ 0.000                  |
| 0.810                 | 19.443 $\pm$ 0.022 | 27.091 $\pm$ 0.020 | 32.117 $\pm$ 0.082 | 32.545 $\pm$ 0.012 | 25.500 $\pm$ 0.027                  |
| 0.750                 | 19.455 $\pm$ 0.000 | 27.076 $\pm$ 0.008 | 32.058 $\pm$ 0.012 | 32.549 $\pm$ 0.084 | 25.476 $\pm$ 0.007                  |
| 0.725                 | 19.455 $\pm$ 0.000 | 27.179 $\pm$ 0.044 | 32.065 $\pm$ 0.012 | 32.531 $\pm$ 0.000 | 25.461 $\pm$ 0.045                  |
| 0.695                 | 19.417 $\pm$ 0.000 | 27.164 $\pm$ 0.009 | 32.051 $\pm$ 0.000 | 32.514 $\pm$ 0.084 | 25.441 $\pm$ 0.007                  |
| 0.625                 | 19.455 $\pm$ 0.000 | 27.115 $\pm$ 0.000 | 32.099 $\pm$ 0.012 | 32.489 $\pm$ 0.023 | 25.407 $\pm$ 0.011                  |
| 0.595                 | 19.417 $\pm$ 0.000 | 27.205 $\pm$ 0.048 | 32.082 $\pm$ 0.021 | 32.473 $\pm$ 0.020 | 25.423 $\pm$ 0.012                  |
| 0.500                 | 19.380 $\pm$ 0.000 | 27.159 $\pm$ 0.000 | 32.044 $\pm$ 0.012 | 32.432 $\pm$ 0.012 | 25.394 $\pm$ 0.000                  |
| 0.425                 | 19.279 $\pm$ 0.010 | 27.218 $\pm$ 0.000 | 32.065 $\pm$ 0.012 | 32.493 $\pm$ 0.035 | 25.385 $\pm$ 0.015                  |
| 0.375                 | 19.212 $\pm$ 0.000 | 27.268 $\pm$ 0.009 | 32.065 $\pm$ 0.012 | 32.446 $\pm$ 0.000 | 25.389 $\pm$ 0.007                  |
| 0.333                 | 19.182 $\pm$ 0.021 | 27.284 $\pm$ 0.008 | 32.106 $\pm$ 0.012 | 32.475 $\pm$ 0.012 | 25.407 $\pm$ 0.000                  |
| 0.250                 | 19.022 $\pm$ 0.016 | 27.307 $\pm$ 0.000 | 32.141 $\pm$ 0.012 | 32.468 $\pm$ 0.000 | 25.411 $\pm$ 0.007                  |
| 0.190                 | 18.815 $\pm$ 0.000 | 27.307 $\pm$ 0.000 | 32.203 $\pm$ 0.012 | 32.534 $\pm$ 0.103 | 25.394 $\pm$ 0.000                  |
| 0.143                 | 18.657 $\pm$ 0.000 | 27.405 $\pm$ 0.000 | 32.210 $\pm$ 0.012 | 32.452 $\pm$ 0.011 | 25.394 $\pm$ 0.022                  |
| 0.081                 | 18.193 $\pm$ 0.019 | 27.427 $\pm$ 0.000 | 32.293 $\pm$ 0.012 | 32.498 $\pm$ 0.071 | 25.402 $\pm$ 0.007                  |
| 0.045                 | 17.841 $\pm$ 0.000 | 27.447 $\pm$ 0.009 | 32.439 $\pm$ 0.012 | 32.425 $\pm$ 0.000 | 25.419 $\pm$ 0.000                  |
| 0.000                 | 16.013 $\pm$ 0.000 | 27.457 $\pm$ 0.000 | 32.552 $\pm$ 0.000 | 32.418 $\pm$ 0.012 | 25.407 $\pm$ 0.000                  |

**Table S4. Wavenumbers for each probe in the ternary mixture methanol/formamide/acetonitrile at 298.15 K (values in kK, 1 kK =  $10^3 \text{ cm}^{-1}$ ).**

| Methanol/Formamide/Acetonitrile |                        |                    |                    |                    |                    |                                     |
|---------------------------------|------------------------|--------------------|--------------------|--------------------|--------------------|-------------------------------------|
| $x_{\text{methanol}}$           | $x_{\text{formamide}}$ | Betaine(30)        | 4-Nitroaniline     | 4-Nitrophenol      | 4-Nitroanisole     | <i>N,N</i> -dimethyl-4-nitroaniline |
| 0.333                           | 0.333                  | 19.411 $\pm$ 0.016 | 26.667 $\pm$ 0.009 | 31.012 $\pm$ 0.031 | 32.113 $\pm$ 0.000 | 24.892 $\pm$ 0.017                  |
| 0.500                           | 0.250                  | 19.520 $\pm$ 0.023 | 26.686 $\pm$ 0.007 |                    | 32.154 $\pm$ 0.000 | 25.031 $\pm$ 0.024                  |
| 0.500                           | 0.150                  | 19.463 $\pm$ 0.000 | 26.865 $\pm$ 0.022 |                    | 32.489 $\pm$ 0.000 | 25.190 $\pm$ 0.025                  |
| 0.500                           | 0.050                  | 19.406 $\pm$ 0.020 | 27.064 $\pm$ 0.013 | 32.129 $\pm$ 0.020 | 32.489 $\pm$ 0.000 | 25.305 $\pm$ 0.016                  |
| 0.500                           | 0.350                  | 19.576 $\pm$ 0.012 | 26.488 $\pm$ 0.007 |                    | 32.072 $\pm$ 0.000 | 24.884 $\pm$ 0.009                  |
| 0.250                           | 0.500                  | 19.430 $\pm$ 0.015 | 26.377 $\pm$ 0.029 |                    | 31.888 $\pm$ 0.000 | 24.656 $\pm$ 0.015                  |
| 0.350                           | 0.500                  | 19.552 $\pm$ 0.018 | 26.316 $\pm$ 0.000 |                    | 31.926 $\pm$ 0.032 | 24.677 $\pm$ 0.021                  |
| 0.150                           | 0.500                  | 19.323 $\pm$ 0.015 | 26.511 $\pm$ 0.000 |                    | 31.939 $\pm$ 0.011 | 24.685 $\pm$ 0.030                  |
| 0.050                           | 0.500                  | 19.125 $\pm$ 0.020 | 26.499 $\pm$ 0.027 | 31.476 $\pm$ 0.015 | 31.919 $\pm$ 0.011 | 24.717 $\pm$ 0.027                  |
| 0.250                           | 0.250                  | 19.320 $\pm$ 0.011 | 26.856 $\pm$ 0.031 | 31.632 $\pm$ 0.016 | 32.154 $\pm$ 0.000 | 25.031 $\pm$ 0.023                  |
| 0.350                           | 0.150                  | 19.357 $\pm$ 0.013 | 26.945 $\pm$ 0.039 |                    | 32.489 $\pm$ 0.000 | 25.178 $\pm$ 0.016                  |
| 0.450                           | 0.050                  | 19.330 $\pm$ 0.014 | 27.073 $\pm$ 0.018 | 31.915 $\pm$ 0.011 | 32.489 $\pm$ 0.000 | 25.308 $\pm$ 0.007                  |
| 0.150                           | 0.350                  | 19.137 $\pm$ 0.007 | 26.748 $\pm$ 0.015 | 31.586 $\pm$ 0.000 | 32.134 $\pm$ 0.000 | 24.896 $\pm$ 0.010                  |
| 0.750                           | 0.125                  | 19.538 $\pm$ 0.021 | 26.852 $\pm$ 0.032 |                    | 32.489 $\pm$ 0.000 | 25.292 $\pm$ 0.011                  |
| 0.125                           | 0.750                  | 19.481 $\pm$ 0.017 | 26.128 $\pm$ 0.014 |                    | 31.612 $\pm$ 0.020 | 24.366 $\pm$ 0.027                  |
| 0.125                           | 0.125                  | 18.811 $\pm$ 0.000 | 27.102 $\pm$ 0.014 | 31.888 $\pm$ 0.000 | 32.489 $\pm$ 0.000 | 25.238 $\pm$ 0.022                  |
| 0.050                           | 0.050                  | 18.208 $\pm$ 0.000 | 27.281 $\pm$ 0.010 | 32.092 $\pm$ 0.000 | 32.489 $\pm$ 0.000 | 25.305 $\pm$ 0.012                  |
| 0.050                           | 0.900                  | 19.516 $\pm$ 0.023 | 25.988 $\pm$ 0.000 |                    | 31.520 $\pm$ 0.030 | 24.199 $\pm$ 0.025                  |
| 0.900                           | 0.050                  | 19.481 $\pm$ 0.005 | 26.899 $\pm$ 0.029 |                    | 32.531 $\pm$ 0.000 | 25.465 $\pm$ 0.024                  |
| 0.950                           | 0.025                  | 19.433 $\pm$ 0.021 | 26.940 $\pm$ 0.006 |                    | 32.680 $\pm$ 0.000 | 25.569 $\pm$ 0.007                  |
| 0.025                           | 0.950                  | 19.496 $\pm$ 0.014 | 25.961 $\pm$ 0.000 |                    | 31.449 $\pm$ 0.023 | 24.136 $\pm$ 0.015                  |
| 0.025                           | 0.025                  | 17.745 $\pm$ 0.016 | 27.349 $\pm$ 0.012 | 32.113 $\pm$ 0.000 | 32.489 $\pm$ 0.000 | 25.376 $\pm$ 0.006                  |

**Table S5. Adjusted parameters for the Bosch and Rosés model for betaine (30) at 298.15 K. Data referring to methanol/acetonitrile was taken from our previous work [23,24] .**

| Parameter  | Mixture            |                              |                       |
|------------|--------------------|------------------------------|-----------------------|
|            | Methanol/Formamide | Formamide/Acetonitrile       | Methanol/Acetonitrile |
| $Y_1$      | 19.386             | 19.46                        | 19.39                 |
| $s$        | $\pm 0.05$         | $\pm 0.1$                    | $\pm 0.02$            |
| $CL$ (%)   | 100                | 100                          | 100                   |
| $Y_2$      | 19.612             | 16.00                        | 16.02                 |
| $s$        | $\pm 0.006$        | $\pm 0.05$                   | $\pm 0.03$            |
| $CL$ (%)   | 100                | 100                          | 100                   |
| $Y_{12}$   | 19.83              | <b>19.09</b>                 | 19.53                 |
| $s$        | $\pm 0.03$         | <b><math>\pm 0.06</math></b> | $\pm 0.02$            |
| $CL$ (%)   | 100                | ---                          | 100                   |
| $f_{2/1}$  | 2.7                | 0.12                         | 0.4                   |
| $s$        | $\pm 0.5$          | $\pm 0.02$                   | $\pm 0.2$             |
| $CL$ (%)   | 99.7               | 100                          | 88.0                  |
| $f_{12/1}$ | 4.9                | <b>1.12</b>                  | 7.1                   |
| $s$        | $\pm 0.7$          | <b><math>\pm 0.02</math></b> | $\pm 4.4$             |
| $CL$ (%)   | 99.9               | ---                          | 86.9                  |
| $m$        | 2                  | 1                            | 2                     |
| $r^2$      | 0.998              | 0.993                        | 0.999                 |
| $s_{adj}$  | 0.005              | 0.089                        | 0.023                 |
| $F$        | 559                | 465                          | 4239                  |
| $N$        | 10                 | 10                           | 19                    |

**Table S6. Adjusted parameters for the Bosch and Rosés model for 4-nitroaniline at 298.15 K. Data referring to methanol/acetonitrile was taken from our previous work [3].**

| Parameter  | Mixture                      |                              |                              |
|------------|------------------------------|------------------------------|------------------------------|
|            | Methanol/Formamide           | Formamide/Acetonitrile       | Methanol/Acetonitrile        |
| $Y_1$      | 27.02                        | 25.97                        | 27.05                        |
| $s$        | $\pm 0.03$                   | $\pm 0.02$                   | $\pm 0.02$                   |
| $CL$ (%)   | 100                          | 100                          | 100                          |
| $Y_2$      | 25.95                        | 27.48                        | 27.47                        |
| $s$        | $\pm 0.02$                   | $\pm 0.02$                   | $\pm 0.02$                   |
| $CL$ (%)   | 100                          | 100                          | 100                          |
| $Y_{12}$   | <b>26.30</b>                 | <b>26.57</b>                 | <b>27.20</b>                 |
| $s$        | <b><math>\pm 0.03</math></b> | <b><math>\pm 0.03</math></b> | <b><math>\pm 0.02</math></b> |
| $CL$ (%)   | ---                          | ---                          | ---                          |
| $f_{2/1}$  | 2.0                          | 0.65                         | 0.6                          |
| $s$        | $\pm 0.2$                    | $\pm 0.05$                   | $\pm 0.1$                    |
| $CL$ (%)   | 100                          | 100                          | 100                          |
| $f_{12/1}$ | <b>3.0</b>                   | <b>1.65</b>                  | <b>1.6</b>                   |
| $s$        | <b><math>\pm 0.2</math></b>  | <b><math>\pm 0.05</math></b> | <b><math>\pm 0.1</math></b>  |
| $CL$ (%)   | ---                          | ---                          | ---                          |
| $m$        | 1                            | 1                            | 1                            |
| $r^2$      | 0.993                        | 0.997                        | 0.955                        |
| $s_{adj}$  | 0.029                        | 0.026                        | 0.029                        |
| $F$        | 580                          | 1408                         | 180                          |
| $N$        | 11                           | 11                           | 20                           |

**Table S7. Adjusted parameters for the Bosch and Rosés model for 4-nitrophenol at 298.15 K. Data referring to methanol/acetonitrile was taken from our previous work [3] .**

| Parameter  | Mixture            |                        |                       |
|------------|--------------------|------------------------|-----------------------|
|            | Methanol/Formamide | Formamide/Acetonitrile | Methanol/Acetonitrile |
| $Y_1$      |                    |                        | 32.10                 |
| $s$        | ---                | ---                    | $\pm 0.01$            |
| $CL$ (%)   |                    |                        | 100                   |
| $Y_2$      |                    |                        | 32.56                 |
| $s$        | ---                | ---                    | $\pm 0.02$            |
| $CL$ (%)   |                    |                        | 100                   |
| $Y_{12}$   |                    |                        | 31.95                 |
| $s$        | ---                | ---                    | $\pm 0.06$            |
| $CL$ (%)   |                    |                        | 100                   |
| $f_{2/1}$  |                    |                        | 0.11                  |
| $s$        | ---                | ---                    | $\pm 0.08$            |
| $CL$ (%)   |                    |                        | 80.6                  |
| $f_{12/1}$ |                    |                        | 0.7                   |
| $s$        | ---                | ---                    | $\pm 0.7$             |
| $CL$ (%)   |                    |                        | 69.3                  |
| $m$        | ---                | ---                    | 2                     |
| $r^2$      |                    |                        | 0.977                 |
| $s_{adj}$  |                    |                        | 0.020                 |
| $F$        | ---                | ---                    | 160                   |
| $N$        |                    |                        | 20                    |

**Table S8. Adjusted parameters for the Bosch and Rosés model for 4-nitroanisole at 298.15 K. Data referring to methanol/acetonitrile was taken from our previous work [3].**

| Parameter  | Mixture                      |                              |                              |
|------------|------------------------------|------------------------------|------------------------------|
|            | Methanol/Formamide           | Formamide/Acetonitrile       | Methanol/Acetonitrile        |
| $Y_1$      | 32.70                        | 31.46                        | 32.71                        |
| $s$        | $\pm 0.03$                   | $\pm 0.04$                   | $\pm 0.02$                   |
| $CL$ (%)   | 100                          | 100                          | 100                          |
| $Y_2$      | 31.45                        | 32.44                        | 32.43                        |
| $s$        | $\pm 0.02$                   | $\pm 0.04$                   | $\pm 0.01$                   |
| $CL$ (%)   | 100                          | 100                          | 100                          |
| $Y_{12}$   | <b>31.94</b>                 | <b>31.99</b>                 | <b>32.48</b>                 |
| $s$        | <b><math>\pm 0.03</math></b> | <b><math>\pm 0.05</math></b> | <b><math>\pm 0.01</math></b> |
| $CL$ (%)   |                              |                              |                              |
| $f_{2/1}$  | 1.5                          | 1.2                          | 4.8                          |
| $s$        | $\pm 0.1$                    | $\pm 0.2$                    | $\pm 1.1$                    |
| $CL$ (%)   | 100                          | 99.9                         | 99.9                         |
| $f_{12/1}$ | <b>2.5</b>                   | <b>2.2</b>                   | <b>5.8</b>                   |
| $s$        | <b><math>\pm 0.1</math></b>  | <b><math>\pm 0.2</math></b>  | <b><math>\pm 1.1</math></b>  |
| $CL$ (%)   |                              |                              |                              |
| $m$        | 1                            | 1                            | 1                            |
| $r^2$      | 0.996                        | 0.979                        | 0.931                        |
| $s_{adj}$  | 0.028                        | 0.048                        | 0.020                        |
| $F$        | 898                          | 187                          | 88                           |
| $N$        | 11                           | 11                           | 16                           |

**Table S9. Adjusted parameters for the Bosch and Rosés model for *N,N*-dimethyl-4-nitroaniline at 298.15 K. Data referring to methanol/acetonitrile was taken from our previous work [3].**

| Parameter  | Mixture                      |                              |                       |
|------------|------------------------------|------------------------------|-----------------------|
|            | Methanol/Formamide           | Formamide/Acetonitrile       | Methanol/Acetonitrile |
| $Y_1$      | 25.65                        | 24.06                        | 25.65                 |
| $s$        | $\pm 0.04$                   | $\pm 0.06$                   | $\pm 0.01$            |
| $CL$ (%)   | 100                          | 100                          | 100                   |
| $Y_2$      | 24.09                        | 25.42                        | 25.41                 |
| $s$        | $\pm 0.03$                   | $\pm 0.06$                   | $\pm 0.01$            |
| $CL$ (%)   | 100                          | 100                          | 100                   |
| $Y_{12}$   | <b>24.71</b>                 | <b>24.81</b>                 | 23.40                 |
| $s$        | <b><math>\pm 0.04</math></b> | <b><math>\pm 0.08</math></b> | $\pm 9.6$             |
| $CL$ (%)   |                              |                              | 97.1                  |
| $f_{2/1}$  | 1.5                          | 1.2                          | 8.7                   |
| $s$        | $\pm 0.2$                    | $\pm 0.2$                    | $\pm 3.0$             |
| $CL$ (%)   | 100                          | 99.9                         | 98.9                  |
| $f_{12/1}$ | <b>2.5</b>                   | <b>2.2</b>                   | 0.2                   |
| $s$        | <b><math>\pm 0.2</math></b>  | <b><math>\pm 0.2</math></b>  | $\pm 0.8$             |
| $CL$ (%)   |                              |                              | 16.2                  |
| $m$        | 1                            | 1                            | 2                     |
| $r^2$      | 0.995                        | 0.977                        | 0.989                 |
| $s_{adj}$  | 0.038                        | 0.069                        | 0.009                 |
| $F$        | 691                          | 170                          | 320                   |
| $N$        | 10                           | 11                           | 19                    |

**Table S10. Adjusted parameters for the Bosch and Rosés model for each probe in the ternary mixture methanol/formamide/acetonitrile at 298.15 K.**

| Parameter   | Betaine (30) | 4-Nitroaniline | 4-Nitrophenol | 4-Nitroanisole | <i>N,N</i> -dimethyl-4-nitroaniline |
|-------------|--------------|----------------|---------------|----------------|-------------------------------------|
| $Y_1$       | 19.40        | 26.99          |               | 32.69          | 25.635                              |
| $s$         | $\pm 0.03$   | $\pm 0.01$     | ---           | $\pm 0.03$     | $\pm 0.008$                         |
| $CL$ (%)    | 100          | 100            |               | 100            | 100                                 |
| $Y_2$       | 19.50        | 25.95          |               | 31.43          | 24.093                              |
| $s$         | $\pm 0.02$   | $\pm 0.02$     | ---           | $\pm 0.03$     | $\pm 0.009$                         |
| $CL$ (%)    | 100          | 100            |               | 100            | 100                                 |
| $Y_3$       | 16.03        | 27.43          |               | 32.45          | 25.425                              |
| $s$         | $\pm 0.04$   | $\pm 0.02$     | ---           | $\pm 0.02$     | $\pm 0.007$                         |
| $CL$ (%)    | 100          | 100            |               | 100            | 100                                 |
| $Y_{12}$    | 19.9         |                |               |                |                                     |
| $s$         | $\pm 0.1$    | ---            | ---           | ---            | ---                                 |
| $CL$ (%)    | 100          |                |               |                |                                     |
| $Y_{13}$    | 19.54        |                |               |                | 25.19                               |
| $s$         | $\pm 0.03$   | ---            | ---           | ---            | $\pm 0.04$                          |
| $CL$ (%)    | 100          |                |               |                | 100                                 |
| $f_{2/1}$   | 1.6          | 1.8            |               | 1.6            | 1.48                                |
| $s$         | $\pm 0.8$    | $\pm 0.1$      | ---           | $\pm 0.2$      | $\pm 0.06$                          |
| $CL$ (%)    | 95.4         | 100            |               | 100            | 100                                 |
| $f_{3/1}$   | 0.2          | 1.3            |               | 1.9            | 1.48                                |
| $s$         | $\pm 0.1$    | $\pm 0.1$      | ---           | $\pm 0.3$      | $\pm 0.06$                          |
| $CL$ (%)    | 94.7         | 100            |               | 100            | 100                                 |
| $f_{12/1}$  | 3.9          |                |               |                |                                     |
| $s$         | $\pm 2.7$    | ---            | ---           | ---            | ---                                 |
| $CL$ (%)    | 83.7         |                |               |                |                                     |
| $f_{13/1}$  | 4.1          |                |               |                | 1.4                                 |
| $s$         | $\pm 2.1$    | ---            | ---           | ---            | $\pm 0.2$                           |
| $CL$ (%)    | 93.8         |                |               |                | 100                                 |
| $f_{123/1}$ | 2.5          |                |               |                |                                     |
| $s$         | $\pm 1.4$    | ---            | ---           | ---            | ---                                 |
| $CL$ (%)    | 92.5         |                |               |                |                                     |
| $Y_{123}$   | 19.0         |                |               |                |                                     |
| $s$         | $\pm 0.4$    | ---            | ---           | ---            | ---                                 |
| $CL$ (%)    | 100          |                |               |                |                                     |
| $m$         | 2            | 1              | ---           | 1              | 2                                   |
| $r^2$       | 0.995        | 0.992          |               | 0.974          | 0.999                               |
| $s_{adj}$   | 0.040        | 0.039          | ---           | 0.058          | 0.016                               |
| $F$         | 849          | 1660           |               | 530            | 6766                                |
| $N$         | 56           | 61             |               | 61             | 53                                  |

**Table S11. Kamlet-Taft parameters for the methanol/formamide mixture at 298.15 K.**

| Methanol/Formamide    |                      |                        |                       |                         |                     |                       |
|-----------------------|----------------------|------------------------|-----------------------|-------------------------|---------------------|-----------------------|
| $x_{\text{methanol}}$ | $\pi^*_{\text{OMe}}$ | $\pi^*_{\text{NMe}_2}$ | $\alpha_{\text{OMe}}$ | $\alpha_{\text{NMe}_2}$ | $\beta_{\text{OH}}$ | $\beta_{\text{NH}_2}$ |
| 1.0                   | 0.591                | 0.721                  | 0.970                 | 1.002                   | 0.725               | 0.621                 |
| 0.9                   | 0.678                | 0.782                  | 0.933                 | 0.979                   |                     | 0.605                 |
| 0.8                   | 0.713                | 0.841                  | 0.922                 | 0.945                   |                     | 0.585                 |
| 0.7                   | 0.808                | 0.886                  | 0.860                 | 0.915                   |                     | 0.606                 |
| 0.6                   | 0.862                | 0.886                  | 0.827                 | 0.921                   |                     | 0.616                 |
| 0.5                   | 0.915                | 1.004                  | 0.787                 | 0.820                   |                     | 0.540                 |
| 0.4                   | 0.953                | 1.030                  | 0.762                 | 0.800                   |                     | 0.518                 |
| 0.3                   | 1.000                | 1.039                  | 0.725                 | 0.789                   |                     | 0.546                 |
| 0.2                   | 1.023                | 1.106                  | 0.710                 | 0.733                   |                     | 0.474                 |
| 0.1                   | 1.075                | 1.133                  | 0.663                 | 0.700                   |                     | 0.468                 |
| 0.0                   | 1.125                | 1.161                  | 0.622                 | 0.670                   |                     | 0.453                 |

**Table S12. Kamlet-Taft parameters for the formamide/acetonitrile mixture at 298.15 K.**

| Formamide/Acetonitrile    |                      |                        |                       |                         |                     |                       |
|---------------------------|----------------------|------------------------|-----------------------|-------------------------|---------------------|-----------------------|
| $x_{\text{acetonitrile}}$ | $\pi^*_{\text{OMe}}$ | $\pi^*_{\text{NMe}_2}$ | $\alpha_{\text{OMe}}$ | $\alpha_{\text{NMe}_2}$ | $\beta_{\text{OH}}$ | $\beta_{\text{NH}_2}$ |
| 1.0                       | 0.709                | 0.788                  | 0.345                 | 0.329                   | 0.352               | 0.375                 |
| 0.9                       | 0.703                | 0.807                  | 0.688                 | 0.699                   | 0.669               | 0.407                 |
| 0.8                       | 0.782                | 0.863                  | 0.687                 | 0.715                   | 0.656               | 0.433                 |
| 0.7                       | 0.813                | 0.886                  | 0.703                 | 0.739                   | 0.661               | 0.449                 |
| 0.6                       | 0.845                | 0.886                  | 0.699                 | 0.762                   | 0.667               | 0.522                 |
| 0.5                       | 0.913                | 0.985                  | 0.674                 | 0.704                   | 0.584               | 0.460                 |
| 0.4                       | 0.896                | 0.964                  | 0.710                 | 0.749                   | 0.664               | 0.530                 |
| 0.3                       | 0.984                | 1.055                  | 0.663                 | 0.691                   | 0.636               | 0.458                 |
| 0.2                       | 1.014                | 1.093                  | 0.666                 | 0.687                   | 0.690               | 0.454                 |
| 0.1                       | 1.037                | 1.125                  | 0.655                 | 0.667                   | 0.801               | 0.441                 |
| 0.0                       | 1.125                | 1.161                  | 0.622                 | 0.670                   |                     | 0.453                 |

**Table S13. Kamlet-Taft parameters for the methanol/acetonitrile mixture at 298.15 K. Data for this mixture was taken from our previous work [3].**

| Methanol/Acetonitrile |                      |                       |                       |                        |                     |                      |
|-----------------------|----------------------|-----------------------|-----------------------|------------------------|---------------------|----------------------|
| $x_{\text{methanol}}$ | $\pi^*_{\text{OMe}}$ | $\pi^*_{\text{NMe2}}$ | $\alpha_{\text{OMe}}$ | $\alpha_{\text{NMe2}}$ | $\beta_{\text{OH}}$ | $\beta_{\text{NH2}}$ |
| 1.000                 | 0.591                | 0.721                 | 0.970                 | 1.002                  | 0.725               | 0.620                |
| 0.955                 | 0.561                | 0.724                 | 1.002                 | 1.006                  | 0.769               | 0.601                |
| 0.910                 | 0.599                | 0.732                 | 0.970                 | 0.984                  | 0.730               | 0.580                |
| 0.875                 | 0.624                | 0.755                 | 0.952                 | 0.966                  | 0.688               | 0.544                |
| 0.810                 | 0.656                | 0.761                 | 0.933                 | 0.956                  | 0.635               | 0.541                |
| 0.750                 | 0.655                | 0.768                 | 0.936                 | 0.955                  | 0.667               | 0.538                |
| 0.725                 | 0.662                | 0.772                 | 0.930                 | 0.951                  | 0.654               | 0.496                |
| 0.695                 | 0.669                | 0.778                 | 0.919                 | 0.939                  | 0.652               | 0.494                |
| 0.625                 | 0.680                | 0.788                 | 0.918                 | 0.938                  | 0.615               | 0.499                |
| 0.595                 | 0.686                | 0.783                 | 0.907                 | 0.931                  | 0.615               | 0.472                |
| 0.500                 | 0.703                | 0.792                 | 0.889                 | 0.915                  | 0.613               | 0.479                |
| 0.425                 | 0.678                | 0.794                 | 0.891                 | 0.906                  | 0.634               | 0.454                |
| 0.375                 | 0.697                | 0.793                 | 0.866                 | 0.888                  | 0.610               | 0.438                |
| 0.333                 | 0.686                | 0.788                 | 0.870                 | 0.889                  | 0.604               | 0.438                |
| 0.250                 | 0.689                | 0.787                 | 0.842                 | 0.861                  | 0.583               | 0.431                |
| 0.190                 | 0.661                | 0.792                 | 0.829                 | 0.833                  | 0.587               | 0.425                |
| 0.143                 | 0.695                | 0.792                 | 0.779                 | 0.794                  | 0.540               | 0.390                |
| 0.081                 | 0.676                | 0.789                 | 0.718                 | 0.722                  | 0.523               | 0.385                |
| 0.045                 | 0.706                | 0.784                 | 0.640                 | 0.653                  | 0.412               | 0.383                |
| 0.000                 | 0.709                | 0.788                 | 0.345                 | 0.337                  | 0.352               | 0.375                |

**Table S14. Kamlet-Taft parameters for the methanol/formamide/acetonitrile mixture at 298.15 K.**

| Methanol/Formamide/Acetonitrile |                        |                      |                       |                       |                        |                     |                      |
|---------------------------------|------------------------|----------------------|-----------------------|-----------------------|------------------------|---------------------|----------------------|
| $x_{\text{methanol}}$           | $x_{\text{formamide}}$ | $\pi^*_{\text{OMe}}$ | $\pi^*_{\text{NMe2}}$ | $\alpha_{\text{OMe}}$ | $\alpha_{\text{NMe2}}$ | $\beta_{\text{OH}}$ | $\beta_{\text{NH2}}$ |
| 0.333                           | 0.333                  | 0.836                | 0.885                 | 0.798                 | 0.826                  | 0.960               | 0.478                |
| 0.500                           | 0.250                  | 0.819                | 0.857                 | 0.828                 | 0.880                  |                     | 0.521                |
| 0.500                           | 0.150                  | 0.680                | 0.765                 | 0.919                 | 0.907                  |                     | 0.513                |
| 0.500                           | 0.050                  | 0.680                | 0.748                 | 0.910                 | 0.925                  | 0.600               | 0.481                |
| 0.500                           | 0.350                  | 0.853                | 0.895                 | 0.812                 | 0.854                  |                     | 0.540                |
| 0.250                           | 0.500                  | 0.930                | 0.966                 | 0.733                 | 0.773                  |                     | 0.499                |
| 0.350                           | 0.500                  | 0.914                | 0.955                 | 0.764                 | 0.800                  |                     | 0.529                |
| 0.150                           | 0.500                  | 0.909                | 0.951                 | 0.731                 | 0.760                  |                     | 0.461                |
| 0.050                           | 0.500                  | 0.917                | 0.950                 | 0.694                 | 0.732                  | 0.629               | 0.477                |
| 0.250                           | 0.250                  | 0.819                | 0.857                 | 0.796                 | 0.843                  | 0.674               | 0.459                |
| 0.350                           | 0.150                  | 0.680                | 0.766                 | 0.902                 | 0.885                  |                     | 0.479                |
| 0.450                           | 0.050                  | 0.680                | 0.748                 | 0.898                 | 0.912                  | 0.707               | 0.480                |
| 0.150                           | 0.350                  | 0.828                | 0.880                 | 0.760                 | 0.777                  | 0.686               | 0.450                |
| 0.750                           | 0.125                  | 0.680                | 0.750                 | 0.931                 | 0.946                  |                     | 0.554                |
| 0.125                           | 0.750                  | 1.045                | 1.064                 | 0.659                 | 0.712                  |                     | 0.486                |
| 0.125                           | 0.125                  | 0.680                | 0.758                 | 0.814                 | 0.800                  | 0.720               | 0.444                |
| 0.050                           | 0.050                  | 0.680                | 0.748                 | 0.718                 | 0.706                  | 0.618               | 0.403                |
| 0.050                           | 0.900                  | 1.083                | 1.107                 | 0.637                 | 0.678                  |                     | 0.477                |
| 0.900                           | 0.050                  | 0.662                | 0.717                 | 0.934                 | 0.977                  |                     | 0.598                |
| 0.950                           | 0.025                  | 0.600                | 0.671                 | 0.971                 | 0.993                  |                     | 0.621                |
| 0.025                           | 0.950                  | 1.113                | 1.131                 | 0.612                 | 0.659                  |                     | 0.464                |
| 0.025                           | 0.025                  | 0.680                | 0.738                 | 0.644                 | 0.638                  | 0.608               | 0.404                |

**Table S15. Wavenumbers for the second band of 4-nitrophenol in the binary mixture methanol/formamide at 298.15 K (values in kK, 1 kK =  $10^3 \text{ cm}^{-1}$ ).**

| Methanol/Formamide    |                    |
|-----------------------|--------------------|
| $x_{\text{methanol}}$ | 4-Nitrophenol      |
| 1.00                  |                    |
| 0.90                  | 25.528 $\pm$ 0.008 |
| 0.80                  | 25.332 $\pm$ 0.012 |
| 0.70                  | 25.134 $\pm$ 0.007 |
| 0.60                  | 25.063 $\pm$ 0.000 |
| 0.50                  | 25.063 $\pm$ 0.000 |
| 0.40                  | 24.694 $\pm$ 0.012 |
| 0.30                  | 24.394 $\pm$ 0.007 |
| 0.20                  | 24.399 $\pm$ 0.011 |
| 0.10                  | 24.213 $\pm$ 0.000 |
| 0.00                  | 24.038 $\pm$ 0.000 |

**Table S16. Wavenumbers for the second band of 4-nitrophenol in the binary mixture formamide/acetonitrile at 298.15 K (values in kK, 1 kK =  $10^3 \text{ cm}^{-1}$ ).**

| Formamide/Acetonitrile    |                    |
|---------------------------|--------------------|
| $x_{\text{acetonitrile}}$ | 4-Nitrophenol      |
| 1.00                      |                    |
| 0.90                      |                    |
| 0.80                      |                    |
| 0.70                      | 24.260 $\pm$ 0.012 |
| 0.60                      | 24.219 $\pm$ 0.012 |
| 0.50                      | 24.244 $\pm$ 0.014 |
| 0.40                      | 24.208 $\pm$ 0.006 |
| 0.30                      | 24.166 $\pm$ 0.000 |
| 0.20                      | 24.147 $\pm$ 0.007 |
| 0.10                      | 24.103 $\pm$ 0.016 |
| 0.00                      | 24.038 $\pm$ 0.000 |

**Table S17. Wavenumbers for the second band of 4-nitrophenol in the ternary mixture methanol/formamide/acetonitrile at 298.15 K (values in kK, 1 kK = 10<sup>3</sup> cm<sup>-1</sup>).**

| Methanol/Formamide/Acetonitrile |                        |                    |
|---------------------------------|------------------------|--------------------|
| $x_{\text{methanol}}$           | $x_{\text{formamide}}$ | 4-Nitrophenol      |
| 0.333                           | 0.333                  | 24.773 $\pm$ 0.020 |
| 0.500                           | 0.250                  | 24.975 $\pm$ 0.022 |
| 0.500                           | 0.150                  | 25.042 $\pm$ 0.031 |
| 0.500                           | 0.050                  | 25.439 $\pm$ 0.031 |
| 0.500                           | 0.350                  | 24.874 $\pm$ 0.004 |
| 0.250                           | 0.500                  | 24.561 $\pm$ 0.019 |
| 0.350                           | 0.500                  | 24.673 $\pm$ 0.020 |
| 0.150                           | 0.500                  | 24.456 $\pm$ 0.021 |
| 0.050                           | 0.500                  | 24.285 $\pm$ 0.004 |
| 0.250                           | 0.250                  | 24.728 $\pm$ 0.000 |
| 0.350                           | 0.150                  | 24.999 $\pm$ 0.024 |
| 0.450                           | 0.050                  | 25.445 $\pm$ 0.000 |
| 0.150                           | 0.350                  | 24.594 $\pm$ 0.000 |
| 0.750                           | 0.125                  | 25.305 $\pm$ 0.011 |
| 0.125                           | 0.750                  | 24.315 $\pm$ 0.014 |
| 0.125                           | 0.125                  |                    |
| 0.050                           | 0.050                  |                    |
| 0.050                           | 0.900                  | 24.136 $\pm$ 0.020 |
| 0.900                           | 0.050                  | 25.512 $\pm$ 0.005 |
| 0.950                           | 0.025                  | 25.570 $\pm$ 0.007 |
| 0.025                           | 0.950                  | 24.150 $\pm$ 0.023 |
| 0.025                           | 0.025                  |                    |

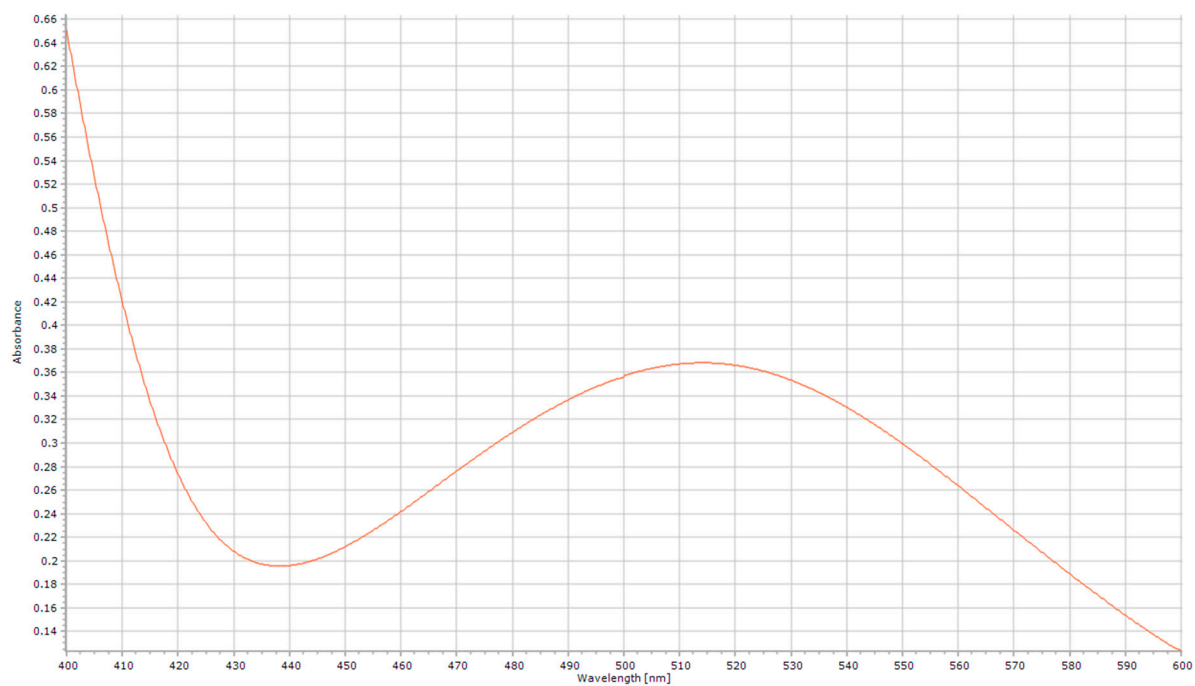

**Figure S1. Spectrum of Betaine (30) in the ternary mixture methanol/formamide/acetonitrile (0.333/0.333/0.333).**
